# Supplementary material for: A Review of Evidence-Based Recommendations for Pericoronitis Management and a Systematic Review of Antibiotic Prescribing for Pericoronitis among Dentists: Inappropriate Pericoronitis Treatment Is a Critical Factor of Antibiotic Overuse in Dentistry
Source: MDPI journal article supplement (doi:10.3390/ijerph18136796), 2021-06-24
Supplement: s1 [file s1]

| <b>Inclusion</b>                                      |
|-------------------------------------------------------|
| original article                                      |
| scientific research reports                           |
| pericoronitis                                         |
| antibiotic prescribing for pericoronitis              |
| antibiotic prescription is given or can be calculated |
| <i>in vivo</i> study                                  |
| human study                                           |
| studies from 01/2000 to 05/2021                       |

| <b>Exclusion</b>                                                      |
|-----------------------------------------------------------------------|
| (n) of subjects < 15                                                  |
| study inclusion criteria for subjects (age, gender)                   |
| study inclusion criteria for subjects' condition (specific anamnesis) |
| <i>in vitro</i> studies                                               |
| review articles                                                       |
| conference summaries                                                  |
| letters to the editor                                                 |
| case reports                                                          |

Table S1. Inclusion and exclusion criteria.
